# Supplementary material for: Highly-stretchable, self-healable random copolymers for loading large amounts of multiwall carbon nanotubes (MWCNTs) for the preparation of stretchable and healable electric sensors
Source: Royal Society of Chemistry journal article supplement (doi:10.1039/c9tc03735g), 2019-01-01
Supplement: c9tc03735g1.pdf [file c9tc03735g1.pdf]

## Supporting Information

Highly-stretchable, self-healable random copolymers for loading large amounts of multiwall carbon nanotube (MWCNT) for the preparation of stretchable and healable electric sensors

Pei-Ni Song and Jin-Long Hong\*

*Department of Materials and Optoelectronic Science*

*National Sun Yat-sen University*

*Kaohsiung, Taiwan 80424, ROC*

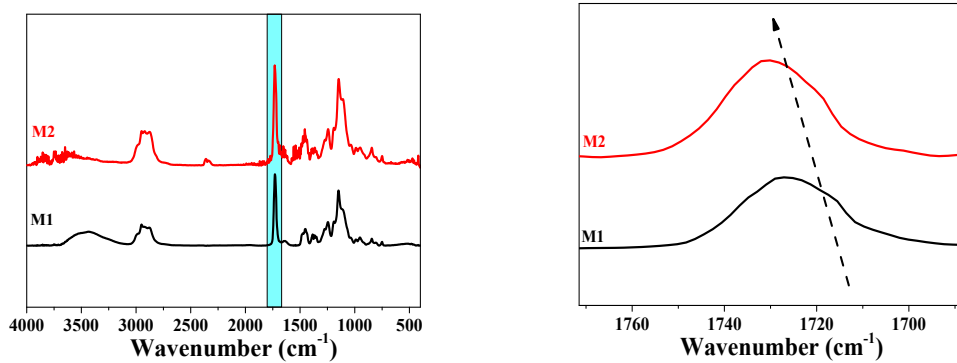

**Figure S1.** FTIR spectra of M1 and M2 recorded at room temperature in (a) the 400-4000  $\text{cm}^{-1}$  and (b) the 1660-1780  $\text{cm}^{-1}$  regions.

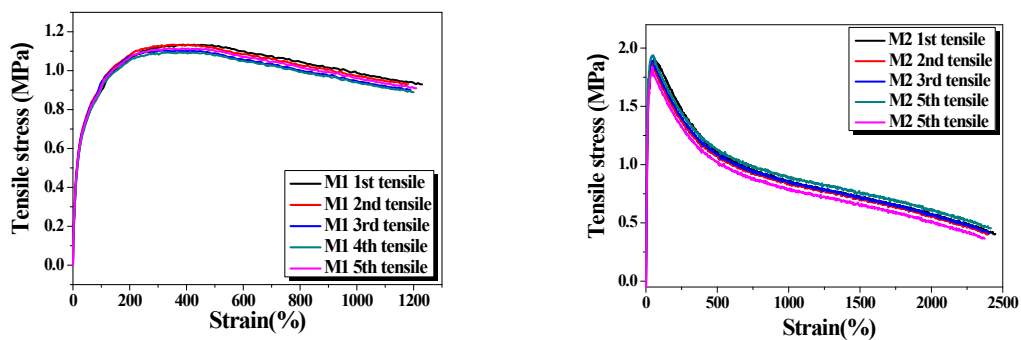

**Figure S2.** Cyclic tensile tests of M1 (left) and M2 (right) showing the mechanical reversibility of the elastomers.

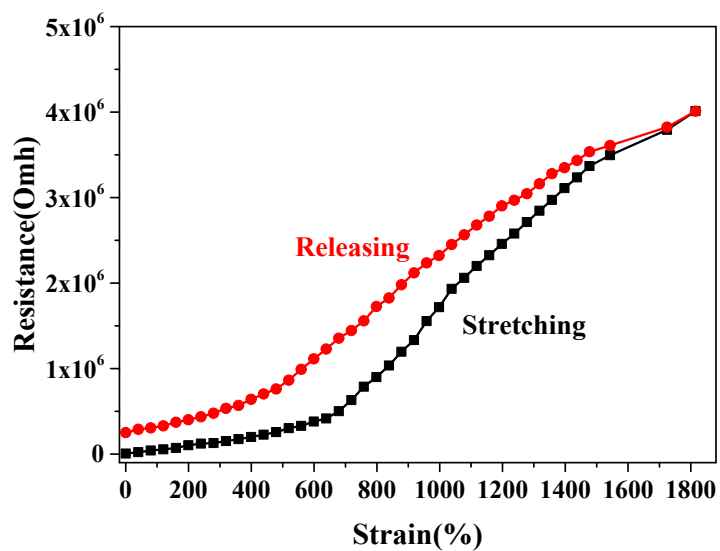

**Figure S3.** Resistance recovery of M2/NT20 conductor film within strain of 1800%.

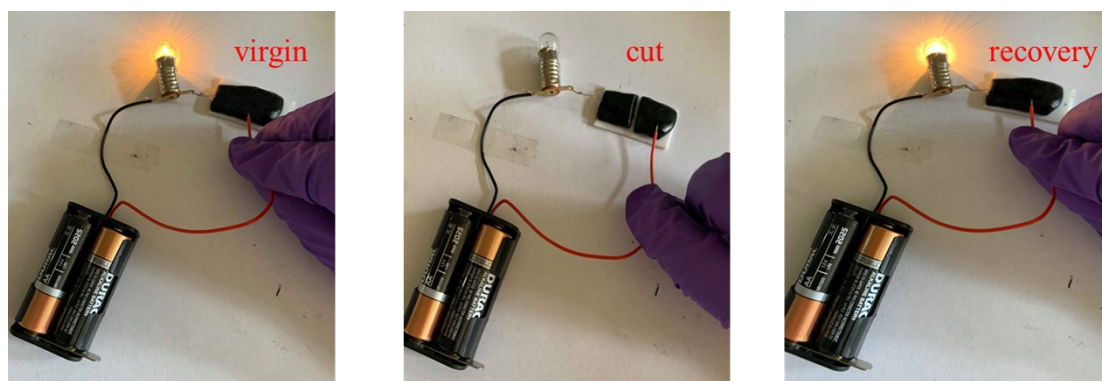

**Figure S4.** Series of photos demonstrating that the conductance of the M2/NT20 films after being cut can be well-restored to result in the light-up of integrated LED again.
